# Supplementary material
Source: PubMed Central journal article supplement (PMC3792583)
Supplement: NIHMS512894-supplement-Supplementary_File.pdf [file NIHMS512894-supplement-Supplementary_File.pdf]

1 Evidence of Aqueous Secondary Organic Aerosol Formation from Biogenic Emissions in the  
2 North American Sonoran Desert

3

4 Jong-Sang Youn<sup>1</sup>, Zhen Wang<sup>2</sup>, Anna Wonaschütz<sup>3</sup>, Avelino Arellano<sup>4</sup>, Eric A. Betterton<sup>4</sup>,  
5 Armin Sorooshian<sup>2,4,1</sup>

6

7 <sup>1</sup>Mel and Enid Zuckerman College of Public Health, University of Arizona, Tucson, Arizona,  
8 USA.

9 <sup>2</sup>Department of Chemical and Environmental Engineering, University of Arizona, Tucson,  
10 Arizona, USA.

11 <sup>3</sup>University of Vienna, Faculty of Physics, Vienna, Austria.

12 <sup>4</sup>Department of Atmospheric Sciences, University of Arizona, Tucson, Arizona, USA.

13

14

15

16

17

18

19

20 **Table S1.** Correlation matrix of the cumulative dataset covering a full annual cycle in Tucson,  
 21 Arizona. “r” values are only reported when statistically significant with a two-tailed student’s T-  
 22 Test at 95% confidence (n = 489). “Water vapor” = water vapor mixing ratio, RH = relative  
 23 humidity, and isoprene/monoterpene correspond to modeled surface concentrations.

|                 | WSOC:OC | WSOC | RH    | Water Vapor | T     | O <sub>3</sub> | NO <sub>2</sub> | CO    | SO <sub>2</sub> | Isoprene | Monoterpene |
|-----------------|---------|------|-------|-------------|-------|----------------|-----------------|-------|-----------------|----------|-------------|
| WSOC:OC         | 1.00    |      |       |             |       |                |                 |       |                 |          |             |
| WSOC            | 0.71    | 1.00 |       |             |       |                |                 |       |                 |          |             |
| RH              | 0.20    | 0.39 | 1.00  |             |       |                |                 |       |                 |          |             |
| Water Vapor     | 0.52    | 0.64 | 0.82  | 1.00        |       |                |                 |       |                 |          |             |
| T               | 0.46    | 0.32 | -0.36 | 0.17        | 1.00  |                |                 |       |                 |          |             |
| O <sub>3</sub>  | 0.36    | 0.12 | -0.38 | --          | 0.60  | 1.00           |                 |       |                 |          |             |
| NO <sub>2</sub> | -0.27   | --   | 0.15  | --          | -0.45 | -0.73          | 1.00            |       |                 |          |             |
| CO              | -0.29   | --   | --    | -0.19       | -0.49 | -0.58          | 0.87            | 1.00  |                 |          |             |
| SO <sub>2</sub> | --      | --   | --    | --          | -0.11 | --             | 0.20            | 0.20  | 1.00            |          |             |
| Isoprene        | 0.22    | --   | -0.25 | --          | 0.66  | 0.52           | -0.47           | -0.44 | -0.24           | 1.00     |             |
| Monoterpene     | 0.36    | 0.29 | 0.24  | 0.50        | 0.43  | 0.13           | -0.28           | -0.38 | -0.15           | 0.60     | 1.00        |

24  
25

26

27

28

29

30

31

32

33

34 **Table S2.** Summary of data (average  $\pm$  standard deviation) during the “dry” and “moist” periods  
 35 in each of the two case studies examined.

|                                    | Case Study 1                     |                                  | Case Study 2                     |                                   |
|------------------------------------|----------------------------------|----------------------------------|----------------------------------|-----------------------------------|
|                                    | Moist                            | Dry                              | Dry                              | Moist                             |
| Time                               | 0500 (12 Sep) -<br>0500 (16 Sep) | 0500 (16 Sep) -<br>0500 (22 Sep) | 0500 (17 Jul) -<br>0500 (21 Jul) | 0500 (21 July) -<br>0500 (23 Jul) |
| WSOC:OC                            | 0.35 $\pm$ 0.07                  | 0.18 $\pm$ 0.05                  | 0.31 $\pm$ 0.06                  | 0.45 $\pm$ 0.08                   |
| WSOC ( $\mu\text{g m}^{-3}$ )      | 1.26 $\pm$ 0.26                  | 0.68 $\pm$ 0.20                  | 1.36 $\pm$ 0.42                  | 1.65 $\pm$ 0.21                   |
| Water Vapor ( $\text{g kg}^{-1}$ ) | 12.43 $\pm$ 1.28                 | 7.85 $\pm$ 2.23                  | 10.72 $\pm$ 3.35                 | 14.79 $\pm$ 1.20                  |
| RH (%)                             | 63.49 $\pm$ 15.83                | 36.92 $\pm$ 15.58                | 42.96 $\pm$ 22.33                | 60.64 $\pm$ 11.53                 |
| T (C)                              | 24.51 $\pm$ 3.26                 | 27.41 $\pm$ 4.06                 | 29.67 $\pm$ 4.35                 | 28.01 $\pm$ 2.58                  |
| O <sub>3</sub> (ppm)               | 0.029 $\pm$ 0.012                | 0.025 $\pm$ 0.012                | 0.031 $\pm$ 0.012                | 0.034 $\pm$ 0.010                 |
| NO <sub>2</sub> (ppb)              | 9.72 $\pm$ 3.94                  | 11.66 $\pm$ 6.22                 | 10.60 $\pm$ 4.29                 | 8.70 $\pm$ 2.87                   |
| CO (ppm)                           | 0.200 $\pm$ 0.052                | 0.183 $\pm$ 0.070                | 0.168 $\pm$ 0.042                | 0.168 $\pm$ 0.034                 |
| SO <sub>2</sub> (ppb)              | 0.162 $\pm$ 0.114                | 0.276 $\pm$ 0.186                | 0.093 $\pm$ 0.038                | 0.033 $\pm$ 0.012                 |
| Isoprene (ppt)                     | 240.7 $\pm$ 165.4                | 251.9 $\pm$ 180.6                | 198.9 $\pm$ 146.8                | 143.9 $\pm$ 98.1                  |
| Monoterpene (ppt)                  | 11.6 $\pm$ 4.9                   | 10.8 $\pm$ 5.6                   | 11.4 $\pm$ 3.5                   | 9.7 $\pm$ 3.5                     |

36  
37

38

39

40

41

42

43

44

45

46 **Table S3.** Correlation matrix of the dataset for Case Study 1 (12-22 September 2011). “r” values  
 47 are only reported when statistically significant with a two-tailed student’s T-Test at 95%  
 48 confidence (n = 37). “Water vapor” = water vapor mixing ratio, RH = relative humidity, and  
 49 isoprene/monoterpene correspond to modeled surface concentrations.

50

|                 | WSOC:OC | WSOC  | RH    | Water Vapor | T    | O <sub>3</sub> | NO <sub>2</sub> | CO    | SO <sub>2</sub> | Isoprene | Monoterpene |
|-----------------|---------|-------|-------|-------------|------|----------------|-----------------|-------|-----------------|----------|-------------|
| WSOC:OC         | 1.00    |       |       |             |      |                |                 |       |                 |          |             |
| WSOC            | 0.86    | 1.00  |       |             |      |                |                 |       |                 |          |             |
| RH              | 0.42    | 0.61  | 1.00  |             |      |                |                 |       |                 |          |             |
| Water Vapor     | 0.61    | 0.66  | 0.92  | 1.00        |      |                |                 |       |                 |          |             |
| T               | --      | -0.41 | -0.89 | -0.68       | 1.00 |                |                 |       |                 |          |             |
| O <sub>3</sub>  | 0.39    | --    | -0.44 | --          | 0.74 | 1.00           |                 |       |                 |          |             |
| NO <sub>2</sub> | --      | --    | --    | --          | --   | -0.64          | 1.00            |       |                 |          |             |
| CO              | --      | 0.38  | --    | --          | --   | -0.41          | 0.83            | 1.00  |                 |          |             |
| SO <sub>2</sub> | --      | --    | --    | --          | --   | --             | --              | --    | 1.00            |          |             |
| Isoprene        | --      | --    | -0.45 | --          | 0.66 | 0.66           | -0.57           | -0.43 | --              | 1.00     |             |
| Monoterpene     | --      | --    | --    | --          | --   | --             | -0.39           | --    | --              | 0.50     | 1.00        |

51

52

53

54

55

56

57

58

59

60 **Table S4.** Correlation matrix of the dataset for Case Study 2 (17-24 July 2012). “r” values are  
 61 only reported when statistically significant with a two-tailed student’s T-Test at 95% confidence  
 62 (n = 23). “Water vapor” = water vapor mixing ratio, RH = relative humidity, and  
 63 isoprene/monoterpene correspond to modeled surface concentrations.

|                 | WSOC:OC | WSOC  | RH    | Water Vapor | T     | O <sub>3</sub> | NO <sub>2</sub> | CO    | SO <sub>2</sub> | Isoprene | Monoterpene |
|-----------------|---------|-------|-------|-------------|-------|----------------|-----------------|-------|-----------------|----------|-------------|
| WSOC:OC         | 1.00    |       |       |             |       |                |                 |       |                 |          |             |
| WSOC            | 0.52    | 1.00  |       |             |       |                |                 |       |                 |          |             |
| RH              | 0.47    | 0.85  | 1.00  |             |       |                |                 |       |                 |          |             |
| Water Vapor     | 0.67    | 0.88  | 0.94  | 1.00        |       |                |                 |       |                 |          |             |
| T               | --      | -0.61 | -0.86 | -0.68       | 1.00  |                |                 |       |                 |          |             |
| O <sub>3</sub>  | 0.44    | --    | --    | --          | 0.72  | 1.00           |                 |       |                 |          |             |
| NO <sub>2</sub> | -0.54   | --    | --    | --          | -0.42 | -0.74          | 1.00            |       |                 |          |             |
| CO              | --      | 0.52  | --    | --          | -0.51 | -0.54          | 0.74            | 1.00  |                 |          |             |
| SO <sub>2</sub> | --      | --    | --    | --          | --    | --             | --              | --    | --              |          |             |
| Isoprene        | --      | -0.43 | -0.43 | --          | 0.66  | 0.63           | -0.67           | -0.59 | --              | 1.00     |             |
| 64 Monoterpene  | --      | --    | --    | --          | --    | --             | --              | --    | --              | --       | 1.00        |

65

66

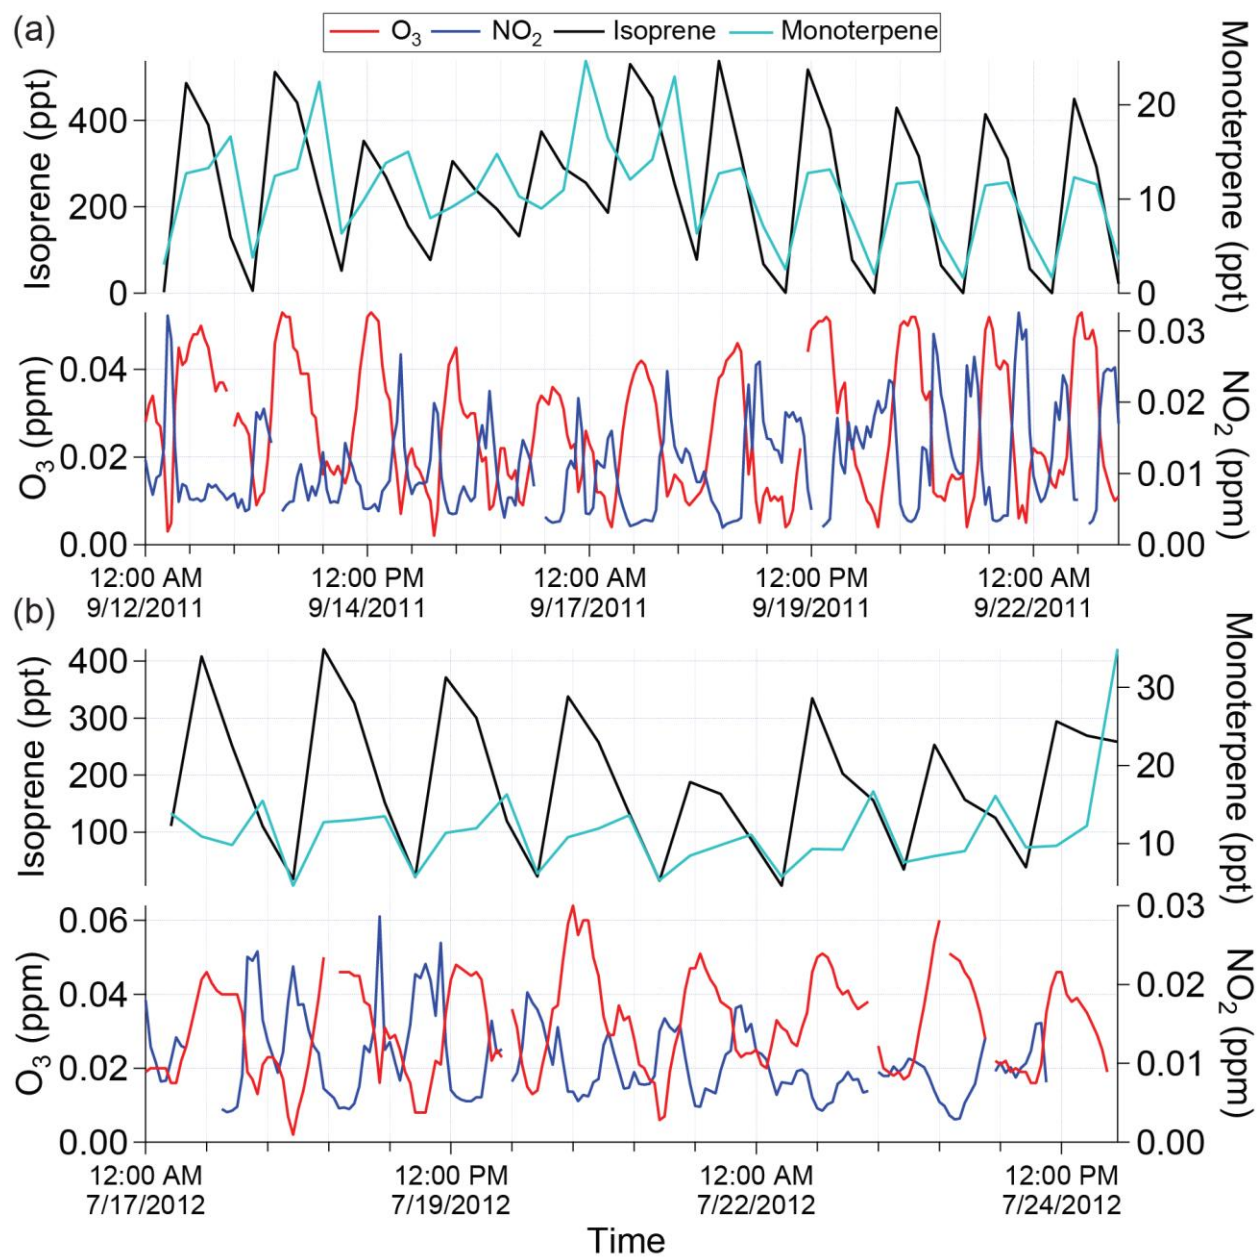

67

68 **Figure S1.** Temporal variation in gas-phase species during the two case studies examined. The

69 average values of these species during the “dry” and “moist” periods for each case study are

70 summarized in Table S2.
